# Supplementary material for: Resection and repair of a Cas9 double-strand break at CTG trinucleotide repeats induces local and extensive chromosomal deletions
Source: PubMed Central journal article supplement (PMC7413560; doi:10.1371/journal.pgen.1008924), 2020-07-16
Supplement: pgen.1008924.s001.pdf [file pgen.1008924.s001.pdf]

### Wild-type *SpCas9* junctions (at the *SUP4* locus)

Parental allele GGAATG CTG<sub>90</sub> CTGGGGGGATCACAGACCAT  
#2 GGAATG CTG<sub>21</sub> ATGCTGGGGGGATCACAGACCAT  
#23 GGAATG CTG<sub>82</sub> (C)TGCTGGGGGGATCACAGACCAT  
#11 GGAATG CTG<sub>5</sub> ----(Δ64 bp)----ATCGGGCGTTCGAC  
#44 GGAATG CT----(Δ279 bp)----ACAGACCAT  
#46 GGAATG CTG<sub>5</sub> C----(Δ260 bp)----ATCACAGACCAT  
#17 CCTTGTAGCCGGGA----(Δ281 bp)----TCACAGACCATTTC  
#19 TCCTTGTAGCCGGG----(Δ312 bp)----CTGAGGCCGACCTG  
#31 TCGTCCTTGTAGCC----(Δ295 bp)----ATTTCTTTCTTTTCG  
#4 #7 (δ20)TTTGTACTCATTATCTATTACATTATCAATCCTT----(Δ305 bp)----TCATTATCTATTACATTATCAATCCTT GCATTTTCAGCTTCC(δ18)  
#39 (δ20)TAATATTAGGTATACAGAATATACTAG----(Δ2837 bp)----AGGTATACAGAATATACTAG AAGTTCTCCTCGAG(δ18)

### *rad52Δ* junctions

Parental allele GGAATG CTG<sub>80</sub> CTGGGGGGATCACAGACCAT  
#B10 #B12 GGAATG CTG CTGGGGGGATCACAGACCAT  
#A3 GGAATG CTG<sub>3</sub> CTGGGGGGATCACAGACCAT  
#C8 GGAATG CTG<sub>4</sub> CTGGGGGGATCACAGACCAT  
#C5 GGAATG CTG<sub>5</sub> CTGGGGGGATCACAGACCAT  
#H4 GGAATG CTG<sub>8</sub> CTG----(Δ262 bp)----CTGCAGCGAA  
#A1 GGAATG C------(Δ255 bp)-----CCAT  
#A2 GTCGTCCTTG----(Δ291 bp)---TGAGGCCGAC  
#A11 AAGCTGGTCA----(Δ579 bp)---CGACCTGCAG  
#B6 GGAATG------(Δ252 bp)-----CAGACCAT  
#B7 GGAATG CTG<sub>3</sub> CT-(Δ276 bp)-ACCTGCAGCG  
#C9 GTCGTCCTTG----(Δ305 bp)---AGCGAAATCT  
#C4 (δ20)ATCCCACCAATTATC-(Δ3021 bp)-CAATTATCAAAAAAT(δ18)  
#C7 (δ20)TTATCTCAAAATTAC-(Δ3029 bp)-AAAATTACCTTTCTT (δ18)

### *sae2Δ* junctions

Normal allele GGAATG CTG<sub>77</sub> CTGGGGGGATCACACA  
#A8 #D2 #D12 GGAATG CTG<sub>3</sub> CTGGGGGGATCACACA  
#D3 GGAATG CTG<sub>72</sub> (C)TGCTGGGGGGATCACACA  
#A2 GGAATG CTG<sub>77</sub> CGCTGGGGGGATCACACA  
#A4 GGAATG CTG<sub>77</sub> C(T)GGGGGGGGATCACACA  
#A5 GGAATG CTG<sub>77</sub> CCTGCTGGGGGGATCACACA  
#A6 GGAATG CTG<sub>77</sub> CTGCGCCTGGGGGGATCACACA  
#A11 GGAATG CTG<sub>77</sub> CTTGGTGGGGGGATCACACA  
#A12 GGAATG CTG<sub>77</sub> CGC(T)GGGGGGATCACACA  
#B5 GGAATG CTG<sub>77</sub> CTGCTGCGCTGGGGGGATCACACA  
#E2 GGAATG CTG<sub>18</sub> CCTGCTGGGGGGATCACACA  
#B2 (δ20)TGTACTCATTATCTATTA ----(Δ3027 bp)-----TCATTATCTATTACATTAT(δ18)

### *dnl4Δ* junctions

Parental allele GGAATG CTG<sub>80</sub> CTGGGGGGATCACA  
#A9 (Δ20)AAGACTTAATATTAGGTATACAGAATATACTAGGAG----(Δ3029 bp)----CAGGTATACAGAATATACTAGAGTTCTCCTCGA(Δ18)  
#B2 (Δ20)TTTCATTAGACTTTTGTACTGTT----(Δ3050 bp)----ACAGTTCCTCGTATCTTATGTCATCG(Δ18)  
#B7 #B9 #D3 (Δ20)ATGTTTGGAAAGAAAAGTGAATTTT----(Δ3052 bp)----GGTGAATTTTGGATAATTGGTGGG(Δ18)  
#B12 (Δ20)GTAAAGACTTAATATTAGGTATACAGAATATACTAG----(Δ3053 bp)----AGGTATACAGAATATACTAGAAGTTCTCCTCGAGGA(Δ18)  
#C10 #C12 (Δ20)CTTATGTTATCTTCTTACACAGTAT----(Δ3049 bp)----ACACCGTATATGATAATATATTGGT(Δ18)  
#E8 #E9 etc. (Δ20)TGATACTTTGTCACTCATTATCCTATTACATTATCAA----(Δ3051 bp)----TCATTATCCTATTACATTATCAATCCTTGCATTTTCAG(Δ18)  
#C9 #E11 (Δ20)TGTTGGTAAAGACTTAATATTAGGTATACAGAATATACTAG----(Δ3054 bp)----TAATATCAGGTATACAGAATATACTAGAAGTTCTCCTCGAG (Δ20)  
#B5 (Δ20)AAAGGTGAATTTTTTGGATAATTG----(Δ2798 bp) +153 bp Tyδ19 chr.10----ATCCTATTACATTATCAATCCTT(Δ19)  
#D11 (Δ20)TTGCTGGGATTCCATTGTTG----(Δ3147 bp) +94 bp Ty1δ21 chr.7----ATTACGATTATTCCTCATTTC(Δ18)

### *sae2Δ dnl4Δ* junctions

Parental allele GGAATG CTG<sub>81</sub> CTGGGGGGATCACA  
#B11 GGAATG CTG<sub>81</sub> CTGGGGGGATCACA  
#B8 #C12 etc. GGAATG CTG<sub>80</sub> CTGGGGGGATCACA  
#C9 #D1 etc. GGAATG CTG<sub>79</sub> CTGGGGGGATCACA  
#A2 GGAATG CTG<sub>3</sub> CTGGGGGGATCACA  
#A3 (Δ20)GTTTCTCAATCCTTATGT----(Δ3050 bp)----CTTATGTCATCGTCTAACACCGTATATGA(Δ18)  
#A8 (Δ20)GTTTCTCAATCCTTATGTATC----(Δ3050 bp)----CTTATGTCATCGTCTAACACCGTAT(Δ18)  
#C4 #C5 etc. (Δ20)ATTACATTATCAATCCTTGCATTT----(Δ3051 bp)----CAATCCTTGCATTTTCAGCTTCCTC(Δ18)  
#B6 (Δ20)GTTTGGAAAGAAAGGTGAATTTT----(Δ3052 bp)----AAAGGTGAATTTTGGATAATT(Δ18)  
#B7 #C3 (Δ20)ATATTAGGTATACAGAATATACTAG----(Δ3053 bp)----AGGTATACAGAATATACTAGAAGTT(Δ18)  
#A4 (Δ20)GTATACAGAATATACTAG----(Δ3226 bp) +176 bp Tyδ12 chr.5----TCTAACACCGTATATGAT(Δ19)  
#C8 (Δ20)TTCTTTGATA--(Δ25 bp) +23 bp Tyδ16 chr.10--TTATCAATCCTTGCATTT----(Δ3033 bp)----TTATCAATCCTTGCATTTTCAGCTTCCTC(Δ18)

### *rad50Δ* junctions

Normal allele GGAATG CTG<sub>80</sub> CTGGGGGGATCACA  
#A3 GGAATG CTG<sub><10</sub> CTGGGGGGATCACA  
#B2 GGAATG CTG<sub>45</sub> CTGGGGGGATCACA  
#B4 GGAATG CTG<sub>120</sub> CTGCTGGGGGGATCACA  
#B5 GGAATG CTG<sub>115</sub> CTGCTGGGGGGATCACA  
#C1 GGAATG CTG<sub>90</sub> CTGGGGGGATCACA  
  
#A2, #A4, #A6, #A7, #A8 (Δ20)TCAATCCTTGCATTTTTAGC------(Δ3050 bp)-----AGCTTCTCTAACTTCGATG(Δ18)  
#A9, #A10, #A11, #A12 (Δ20)AGAATATACTAGGAGTTCTC------(Δ3053 bp)-----AGTTCTCCTCGAGGATATA(Δ18)  
#B1, #B3, #B12 (Δ20)AGAATATACTAGGAGTTCTC------(Δ3053 bp)-----AGTTCTCCTCGAGGATATAG(Δ18)  
#B6, #B7, #B8, #B11 (Δ20)ACTCATTATCCTATTACATTATCAA------(Δ3029 bp)-----CATTATCCTATTACATTATCAATCC(Δ18)  
#B9 (Δ20)TATACAGAATATACTAGGAGTTCTC------(Δ3053 bp)-----AGAATATACTAGAGTTCTCCTCGA(Δ18)  
#C2, #C3, #C4, #C5 (Δ20)AGAATATACTAGGAGTTCTC------(Δ3030 bp)-----AGTTCTCCTCGAGGATATAGG(Δ18)  
#C6 (Δ20)TATCCTATTACATTATCAATCCTTGC------(Δ3028 bp)-----TATTACATTATCAATCCTTGCATTTTC(Δ18)  
#C8, #D2, #D3, #D5, #D7, #D9 (Δ20)CTCATGTATCCTATTACATTATCAATCCTT------(Δ3030 bp)-----TATCCTATTACATTATCAATCCTTGCATT(Δ18)  
#C9, #C10, #C11, #C12, #D6, #D8, #D10, #D11, #D12 (Tyδ4 chr.10)TCATAATTAATAAT--170 bp--ATTTTGGAGATAATTG--ATTTTGGAGATAATTGGTGGG (Δ18)

### Wild-type eSpCas9 junctions (guideRNA #1)

Parental allele GGAATG CTG<sub>78</sub> CTGGGGGGATCACAGACCATTTCTTT  
C4# TCGTCCTTG TAGCCGGG----(Δ280 bp)----GGGATCACAGACCATT  
D12# GGAATG CTG<sub>6</sub>C----- (Δ2541 bp)-----GATGGAAATCATTATTGTAGT(δ18)  
B4# B5# (δ20)TATCTTCTTACACAGTAT----(Δ3050 bp)----GTATATGATAATATATTG(δ18)  
A3# A5# etc. (δ20)ACTTTGTCACTCATTATCCTATTACATTATCAA----(Δ3051 bp)----TCATTATCCTATTACATTATCAATCCTTGCATTT(δ18)  
B1# (δ20)TTCCATTGTTGGTAAAGACT(A)TAATAT----(Δ3053 bp)----ATTGTTGGTAAAGGCTATAATATCAGGTATACAGAAT(δ18)

### Wild-type eSpCas9 junctions (guideRNA #2)

Parental allele GGAATG CTG<sub>78</sub> CTGGGGGGATCACAGACCATTTCTTT  
#A8 GGAATG CTG<sub>17</sub> TTG CTG<sub>5</sub> CTGGGGGGATCACAGACCA  
#A12 GGAATG CTG<sub>66</sub> -----G CTGGGGGGATCACAGACCA  
#C4 GGAATG CTG<sub>25</sub> (C)TTTGGGGGGATCACAGACCATTTCTTT  
#A3 GGAATG CTG<sub>13</sub> CTG----- (Δ238 bp)-----GATCACA  
#A4 TAGCACCACGCC----(Δ1342 bp)----CCCCGGGAGAT  
#A6 TAATTTGTCAGT----(Δ604 bp)----CTTGCAAGTTGA  
#B6 TCTCGGTAGCCA----(Δ401 bp)----CGTTCGACTCGC  
#B9 (δ20)ATAATATAATAGTAACATGAA----(Δ2404 bp)----TGTTGGAATAAAAATCAACTATCATC(δ19)  
#A2 #A5 etc. (δ20)TATCAATCCTTGCAATTT----(Δ3017 bp)----TATCAATCCTTGCAATTT(δ18)  
#C9 (δ20)ATTGTTGGTAAAG----(Δ3039 bp)----ATTGTTGGTAAAG(δ18)  
#E11 (δ20)ACTCATTATCCTATTACATTATCAATCCTTGCAATTT----(Δ3051 bp)----TCCTTGCAATTTAGCTTCCTCTAAC(δ18)  
#D10 #E3 #F7 (δ20)TTAATATTAGGTATACAGAATATACTAG----(Δ3053 bp)----AGGTATACAGAATATACTAGAAGTTCTCCTCGAG(δ18)  
#F8 (δ20) TTCCTTCTTTGATA----(Δ3112 bp)+59 bp Tyδ16 chr.10-----ATGACAGTTCCTCG(δ18)

### Wild-type SpCas9 junctions (at the ARG2 locus)

Parental allele GGAATG CTG<sub>60</sub> CTGGGGGGATCACAGACCATTTCTTT  
#B10 GGAATG CTG<sub>72</sub> CTGGGGGGATCACAGACCATTTCTTT  
#A2 #A3 etc. AGGCGCAAGACTTCAA----(Δ388 bp + TAGGGATAACAGGGTAAT)----CGAAATCTTGAGATCG  
#B5 CATCTAGAGTCGTCCTTG TAGCC--(Δ325 bp)--TTTCTTTCTTTTCGGCCAGGCTG  
#A8 #B11 TCTCCACAGCAGCAGC----- (YAK1-ARG2)-----ATCACAGACCATTTCT
