# Supplementary material for: Resection and repair of a Cas9 double-strand break at CTG trinucleotide repeats induces local and extensive chromosomal deletions
Source: PubMed Central journal article supplement (PMC7413560; doi:10.1371/journal.pgen.1008924), 2020-07-16
Supplement: pgen.1008924.s003.pdf [file pgen.1008924.s003.pdf]

**A**

Relative DNA amount

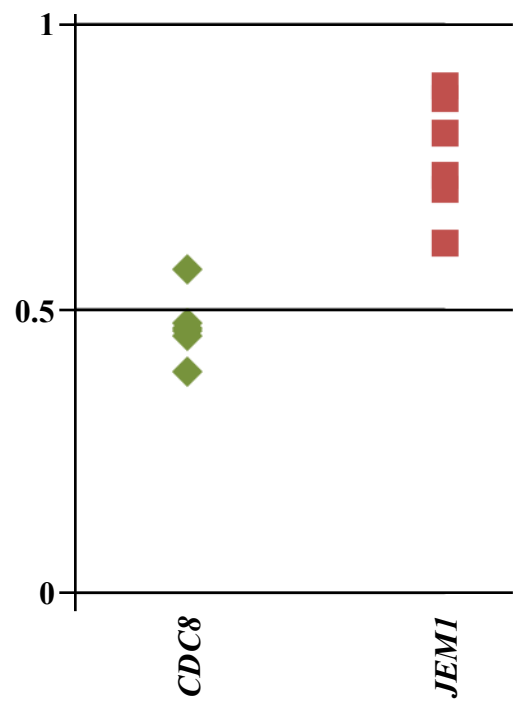**B**

|              |          |          |          | Diploids       |          |                |              | Haploids       |          |          |              |
|--------------|----------|----------|----------|----------------|----------|----------------|--------------|----------------|----------|----------|--------------|
|              |          |          |          | Cas9 repressed |          | Cas9 expressed |              | Cas9 expressed |          |          |              |
|              |          | Indel    |          |                |          | Indel          |              |                |          | Indel    |              |
| Clone        | Substit. | Indel    | micro    | Clone          | Substit. | Indel          | Indel micro. | Clone          | Substit. | Indel    | Indel micro. |
| 1            | -        | -        | -        | 1              | -        | -              | 1            | 1              | -        | -        | -            |
| 2            | 1        | -        | -        | 2              | -        | -              | 1            | 2              | 1        | -        | -            |
| 3            | 1        | -        | -        | 3              | -        | -              | -            | 3              | -        | -        | -            |
| 4            | -        | -        | -        | 4              | -        | -              | -            | 4              | -        | -        | -            |
| 5            | -        | -        | -        | 5              | -        | -              | -            | 5              | -        | -        | -            |
| <b>Total</b> | <b>2</b> | <b>0</b> | <b>0</b> | 6              | -        | -              | -            | 6              | 1        | -        | -            |
|              |          |          |          | 7              | -        | -              | -            | 7              | 1        | -        | -            |
|              |          |          |          | 8              | -        | -              | -            | 8              | 2        | -        | -            |
|              |          |          |          | 9              | -        | -              | -            | 9              | 2        | -        | -            |
|              |          |          |          | 10             | -        | -              | -            | 10             | 1        | -        | -            |
|              |          |          |          | 11             | -        | -              | -            | <b>Total</b>   | <b>8</b> | <b>0</b> | <b>0</b>     |
|              |          |          |          | 12             | -        | -              | -            |                |          |          |              |
|              |          |          |          | 13             | -        | -              | -            |                |          |          |              |
|              |          |          |          | 14             | -        | -              | -            |                |          |          |              |
|              |          |          |          | 15             | 1        | -              | -            |                |          |          |              |
|              |          |          |          | 16             | -        | 1*             | -            |                |          |          |              |
|              |          |          |          | 17             | -        | -              | -            |                |          |          |              |
|              |          |          |          | 18             | 2        | -              | -            |                |          |          |              |
|              |          |          |          | <b>Total</b>   | <b>3</b> | <b>1</b>       | <b>2</b>     |                |          |          |              |
