# Supplementary material for: Resection and repair of a Cas9 double-strand break at CTG trinucleotide repeats induces local and extensive chromosomal deletions
Source: PubMed Central journal article supplement (PMC7413560; doi:10.1371/journal.pgen.1008924), 2020-07-16

**A**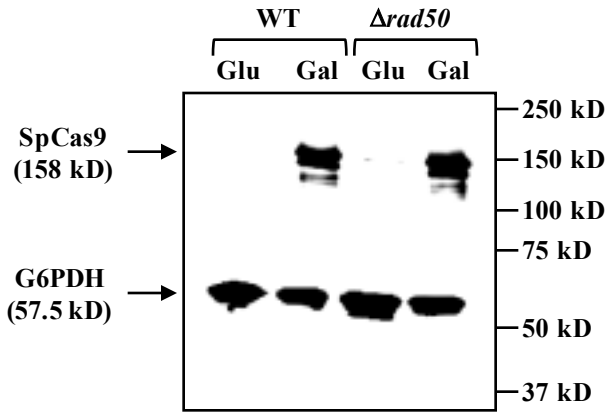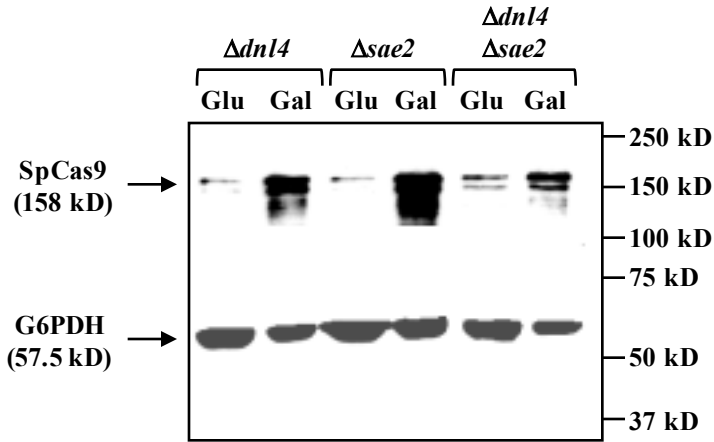**B**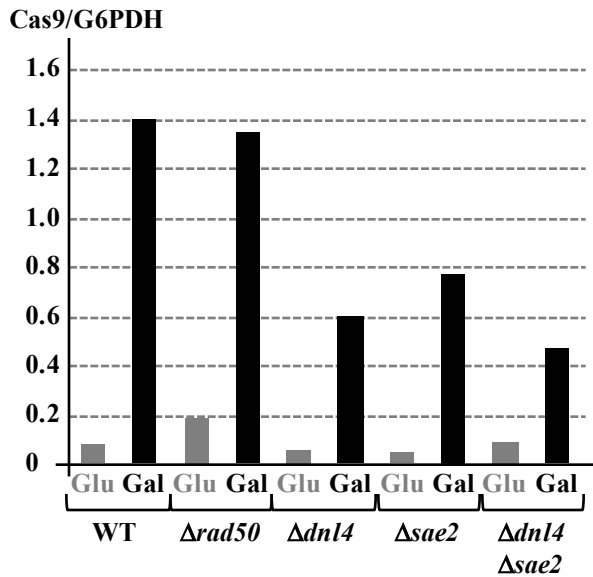

Supplement: pgen.1008924.s005.pdf [file pgen.1008924.s005.pdf]
